# Supplementary material for: Building a research registry for studying birth complications and outcomes in six Palestinian governmental hospitals
Source: PubMed Central journal article supplement (PMC5387267; doi:10.1186/s12884-017-1296-6), 2017-04-11

|  |  |  |  |  |  |
|--|--|--|--|--|--|
|  |  |  |  |  |  |
|--|--|--|--|--|--|

|                                                                                                                                                                                                                                |  |                 |  |
|--------------------------------------------------------------------------------------------------------------------------------------------------------------------------------------------------------------------------------|--|-----------------|--|
| Last name                                                                                                                                                                                                                      |  | First name      |  |
| 1. Patient:                                                                                                                                                                                                                    |  |                 |  |
| 2. Patient ID number:                                                                                                                                                                                                          |  | Phone number 1: |  |
|                                                                                                                                                                                                                                |  | Phone number 2: |  |
| 3. Hospital: <input type="checkbox"/> Al Helal Emirati <input type="checkbox"/> Queen Alia <input type="checkbox"/> PMC <input type="checkbox"/> Rafidia <input type="checkbox"/> Shifa <input type="checkbox"/> Shada Al Aqsa |  |                 |  |

Arrival to hospital

|                              |    |    |    |                |                     |      |         |           |            |
|------------------------------|----|----|----|----------------|---------------------|------|---------|-----------|------------|
| 4. Date and time of arrival: |    |    |    |                | 5. Birth attendant: | MW=1 | OBGYN=2 | Student=3 | Resident=4 |
|                              | dd | mm | yy | Time (24 hour) |                     |      |         |           |            |

Background information

|                                                    |              |                                   |                                                                                                            |                                                          |                                                          |
|----------------------------------------------------|--------------|-----------------------------------|------------------------------------------------------------------------------------------------------------|----------------------------------------------------------|----------------------------------------------------------|
| 7. Date of birth:                                  |              | 8. Marital status:                | <input type="checkbox"/> Married <input type="checkbox"/> Other <input type="checkbox"/> Separated/widowed | 9. Marriage between first cousins:                       | <input type="checkbox"/> No <input type="checkbox"/> Yes |
|                                                    | dd   mm   yy |                                   |                                                                                                            |                                                          |                                                          |
| 10. Education, total years at school and studying: |              | 11. Place of residence:           | <input type="checkbox"/> Urban <input type="checkbox"/> Rural <input type="checkbox"/> Camp                |                                                          |                                                          |
|                                                    |              |                                   |                                                                                                            |                                                          |                                                          |
| 12. Prepregnancy maternal weight:                  |              | 13. Maternal weight at admission: |                                                                                                            | 14. Maternal height:                                     |                                                          |
|                                                    | Kg           |                                   | Kg                                                                                                         |                                                          | Cm                                                       |
|                                                    |              |                                   | 15. Smoking (cigarettes/arghila):                                                                          | <input type="checkbox"/> No <input type="checkbox"/> Yes |                                                          |

Previous pregnancies (excluding current pregnancy)

|                                                                                                                                                                                                                       |  |                                    |  |                                    |     |     |
|-----------------------------------------------------------------------------------------------------------------------------------------------------------------------------------------------------------------------|--|------------------------------------|--|------------------------------------|-----|-----|
| 16. Number of previous vaginal births (> 23+6):                                                                                                                                                                       |  | 17. Number of children alive:      |  | 19. Number of trimester abortions: | 1st | 2nd |
|                                                                                                                                                                                                                       |  |                                    |  |                                    |     |     |
| Of these, how many forceps or vacuum deliveries?                                                                                                                                                                      |  | 18. Number of previous caesareans: |  | 20. Number of ectopic pregnancies: |     |     |
|                                                                                                                                                                                                                       |  |                                    |  |                                    |     |     |
| 21. Pre-existing medical conditions: <input type="checkbox"/> Hypertension <input type="checkbox"/> Diabetes <input type="checkbox"/> Anaemia <input type="checkbox"/> Hypothyroidism <input type="checkbox"/> Other: |  |                                    |  |                                    |     |     |
|                                                                                                                                                                                                                       |  |                                    |  |                                    |     |     |

Maternal health in the current pregnancy (before labour)

|                                                                                                                                                                                                                                                                                                                                                                            |              |                                                   |  |          |                                                          |                                         |
|----------------------------------------------------------------------------------------------------------------------------------------------------------------------------------------------------------------------------------------------------------------------------------------------------------------------------------------------------------------------------|--------------|---------------------------------------------------|--|----------|----------------------------------------------------------|-----------------------------------------|
| 22. Last menstruation period:                                                                                                                                                                                                                                                                                                                                              |              | 23. Number of antenatal visits in this pregnancy: |  | 24. IVF: | <input type="checkbox"/> No <input type="checkbox"/> Yes | 25. Ultrasound estimated date of birth: |
|                                                                                                                                                                                                                                                                                                                                                                            | dd   mm   yy |                                                   |  |          |                                                          |                                         |
| 26. <input type="checkbox"/> Gestational hypertension <input type="checkbox"/> Pre-eclampsia <input type="checkbox"/> Diabetes <input type="checkbox"/> Gestational diabetes                                                                                                                                                                                               |              |                                                   |  |          |                                                          |                                         |
| Other:                                                                                                                                                                                                                                                                                                                                                                     |              |                                                   |  |          |                                                          | dd   mm   yy                            |
| 27. Mother reports medication she has used during pregnancy: <input type="checkbox"/> None <input type="checkbox"/> Antihypertensive medication <input type="checkbox"/> Anticoagulants <input type="checkbox"/> Pain killers <input type="checkbox"/> Iron <input type="checkbox"/> Vitamin supplement <input type="checkbox"/> Folic acid <input type="checkbox"/> Other |              |                                                   |  |          |                                                          |                                         |
| If yes: Please write name of medication and dose:                                                                                                                                                                                                                                                                                                                          |              |                                                   |  |          |                                                          |                                         |
|                                                                                                                                                                                                                                                                                                                                                                            |              |                                                   |  |          |                                                          |                                         |

Reason for arrival to hospital

|                                                                                                                                                                                                                                               |    |                                |       |                                 |                             |
|-----------------------------------------------------------------------------------------------------------------------------------------------------------------------------------------------------------------------------------------------|----|--------------------------------|-------|---------------------------------|-----------------------------|
| 28. <input type="checkbox"/> Contractions <input type="checkbox"/> ROM <input type="checkbox"/> Abdominal pain <input type="checkbox"/> Vaginal bleeding <input type="checkbox"/> PE/hypertensive disorder <input type="checkbox"/> Eclampsia |    |                                |       | 29. Gestational age at arrival: |                             |
| Other:                                                                                                                                                                                                                                        |    |                                |       |                                 | Weeks                       |
| 30. Cervical dilatation at admission:                                                                                                                                                                                                         |    | 31. Blood pressure at arrival: |       | 32. Urine test:                 |                             |
|                                                                                                                                                                                                                                               | Cm |                                | mm HG |                                 |                             |
|                                                                                                                                                                                                                                               |    | 33. From CBC at admission:     |       |                                 |                             |
|                                                                                                                                                                                                                                               |    |                                | HB    | Hct                             | Platelets White blood cells |

|  |  |  |  |  |  |
|--|--|--|--|--|--|
|  |  |  |  |  |  |
|--|--|--|--|--|--|

Labour start

34. Partogram present:  No  Yes

35.  Spontaneous ( if yes; please go to question 37 )  
 Labour induction ( if yes; please continue to question 36 )

36. Indication for induction:  PROM  
 Reduced fetal movement  Post term pregnancy  
 Hypertensive disorder  Diabetes  
 Fetal growth restriction  Large baby

37. Induction method:  Balloon catheter  Amniotomy  
 Cytotec/Misoprostol  Prostin  Oxytocin

38. Amniotic fluid colour:  
 Normal  Meconium stained  Blood stained

39. Oxytocin augmentation:  No ( if no; please go to question 43 )  
 Yes ( If yes; please go to question 40 )

40. Oxytocin in dropper  No  Yes

41. Indication for Oxytocin use:  Prolonged first stage  
 Prolonged second stage

42. Duration for Oxytocin use: Hours  Minutes

43. Duration first stage of labour (HOURS):

44. Duration second stage of labour (MINUTES):

45. Duration of active second stage of labour (pushing):

53. Perineal tears:  Intact perineum  First degree tear  
 Second degree tear  Third degree tear  A  B  C  
 Fourth degree tear

54. Perineal tear/episiotomy sutured by:  Midwife  OBGYN

55. Vaginal epithelium sutured:  
 Continuous  Interrupted  Subcuticular

56. Perineal muscles sutured:  
 Continuous  Interrupted  Subcuticular

57. Perineal skin sutured:  
 Continuous  Interrupted  Subcuticular

58. Total number of newborn (this delivery)<sup>1</sup>:

59. Date of delivery (dd/mm/yy)<sup>1</sup>:

60. Time of delivery (24 hour format)<sup>1</sup>:

61. Fetal presentation at birth<sup>1</sup>:  Normal cephalic  
 Occiput posterior  Breech  Others

62. Newborn at birth<sup>1</sup>:  Alive  Stillbirth

63. Admission NICU<sup>1</sup>:  No  Yes

64. Birthweight<sup>1</sup>:  (GRAMS):

65. Gender<sup>1</sup>:  Girl  Boy

66. Apgar score 5 min<sup>1</sup>:  Apgar 10 min<sup>1</sup>:

67. Newborn has malformation<sup>1</sup>:  
 No  Yes, major  Yes, minor malformation

Birth/delivery

46. Pain relief:  None  Opioids (Pethidine®)  Analgesics  
 Pudendal  Paracervical block  Epidural  Spinal  
 Local infiltration anesthesia  General anesthesia

47. Medication during labour:  No  Yes  
 If yes:  Insulin  Magnesium Sulfate  Anticoagulants  
 Other If other please specify:

48. Complications during labour:  None  Fever  
 Convulsions  Hypertensive crisis  Bleeding  
 Other If other please specify:

49. Delivery method:  Spontaneous  Vacuum extraction  
 Forceps  Emergency caesarean  Planned caesarean

50. Indication for operative delivery:  
 Fetal distress/abnormal CTG  Obstructed labour  
 Multiple gestations  Eclampsia  
 Maternal hypertension/preeclampsia  Bleeding  
 Maternal exhaustion  Previous caesarean  
 Malpresentation  Other If other please specify:

51. Episiotomy:  No  Yes

52. Indication for episiotomy:  Fetal distress  
 Protecting perineum  Primiparity  
 Instrumental delivery  Prolonged second stage

Postpartum/third stage of labour

68.  Prophylactic oxytocin i.m.  Other

69. Excessive bleeding (>500 ml):  No  Yes

70. Treatment for excessive bleeding:  
 Methergin  Cytotec/Misoprostol  
 Oxytocin i.v.  Other If other please specify:

71. Placenta:  Separates spontaneously  Crede maneuver  
 Controlled cord traction  Manual removal

72. Placenta inspection:  Normal  Velamentous  
 Placenta accreta  Placenta percreta

73. Blood transfusion:  Yes  No

74. Uterine rupture:  No  Yes

75. Hysterectomy:  Yes  No

76. Admission of mother to intensive care unit:  No  Yes

77. Admission outcome:  Discharged  
 Referred to other hospital  Maternal death

78. Time point for discharge:     
 dd | mm | yy

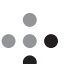

Supplement: 12884_2017_1296_MOESM2_ESM.pdf [file 12884_2017_1296_MOESM2_ESM.pdf]
